# Supplementary material for: An efficient water-soluble fluorescent chemosensor based on furan Schiff base functionalized PEG for the sensitive detection of Al3+ in pure aqueous solution
Source: Royal Society of Chemistry journal article supplement (doi:10.1039/d0nj01856b), 2020-01-01
Supplement: d0nj01856b1.pdf [file d0nj01856b1.pdf]

Electronic Supplementary Material (ESI) for New Journal of Chemistry.

### Supporting Information

## **An efficient water-soluble fluorescent chemosensor based on furan Schiff base functionalized PEG for sensitive detection of Al<sup>3+</sup> in pure aqueous solution**

Liping Bai, Yuhang Xu, Leixuan Li, Farong Tao, Shuangshuang Wang, Liping Wang\* and Guang Li\*

School of Materials Science and Engineering, Liaocheng University, Liaocheng 252059, China

\* Corresponding authors, E-mail: wangliping5@163.com, lglzsd@126.com

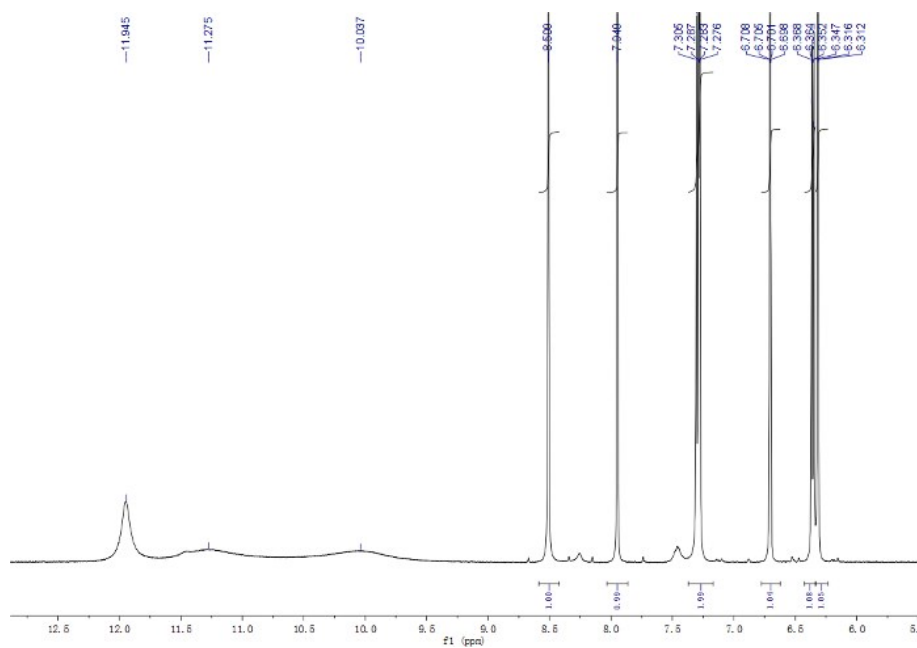

**Fig. S1**  $^1\text{H}$  NMR spectrum of FB in  $\text{DMSO-}d_6$ .

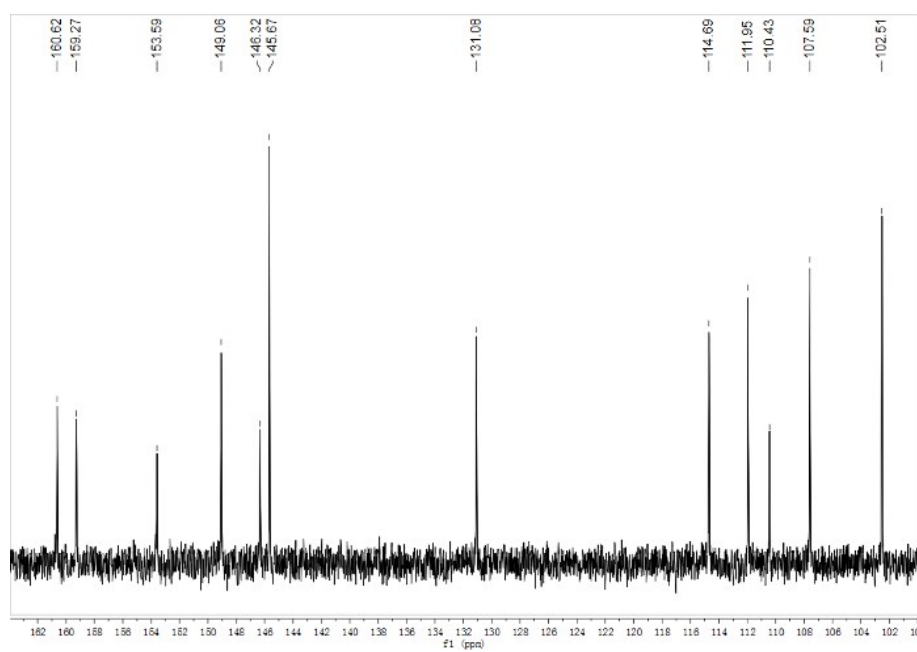

**Fig. S2**  $^{13}\text{C}$  NMR spectrum of FB in  $\text{DMSO-}d_6$ .

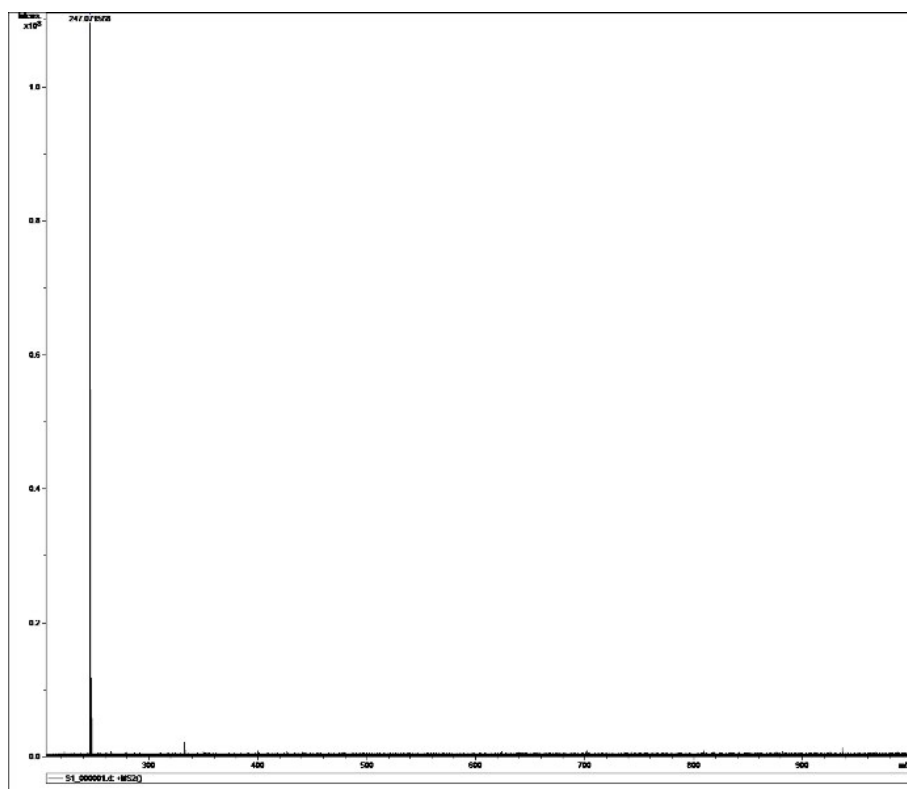

Fig. S3 ESI-MS spectrum of FB.

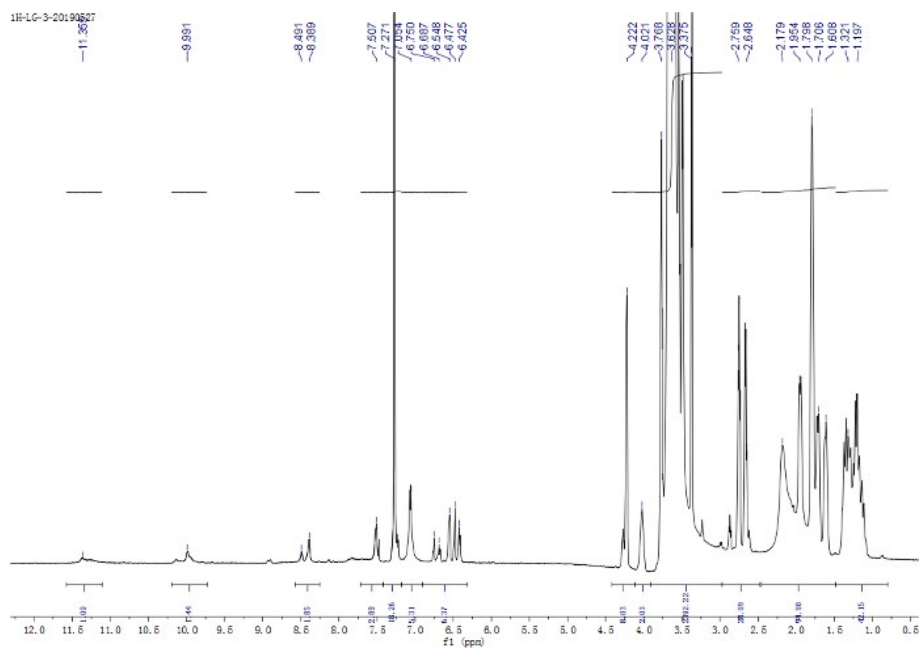

Fig. S4 <sup>1</sup>H NMR spectrum of PEGFB in CDCl<sub>3</sub>.

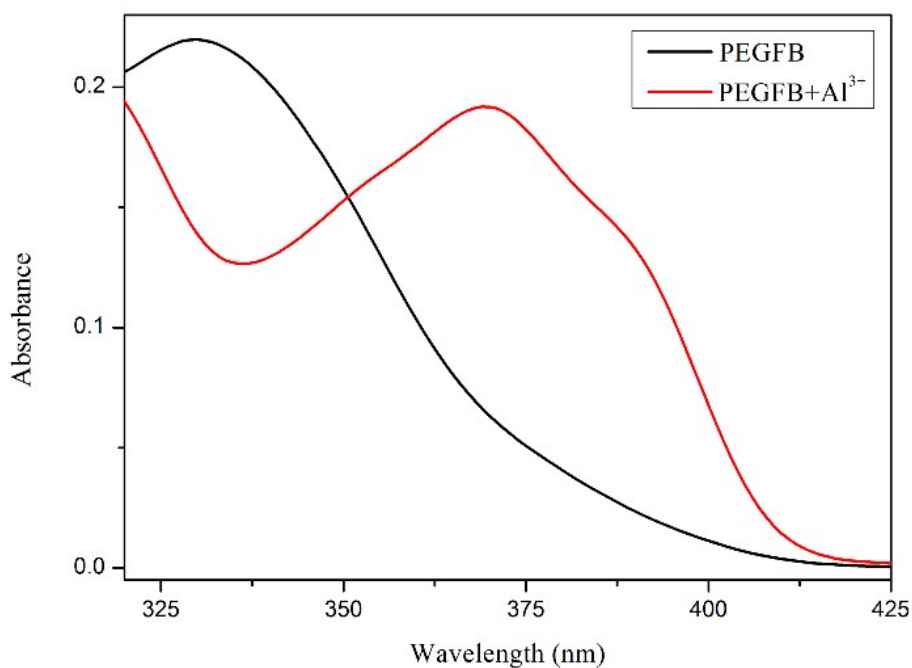

**Fig. S5** UV-Vis absorption spectra of PEGFB (10  $\mu\text{M}$ ) in the absence and presence of 2 equiv. of  $\text{Al}^{3+}$  in aqueous solution.

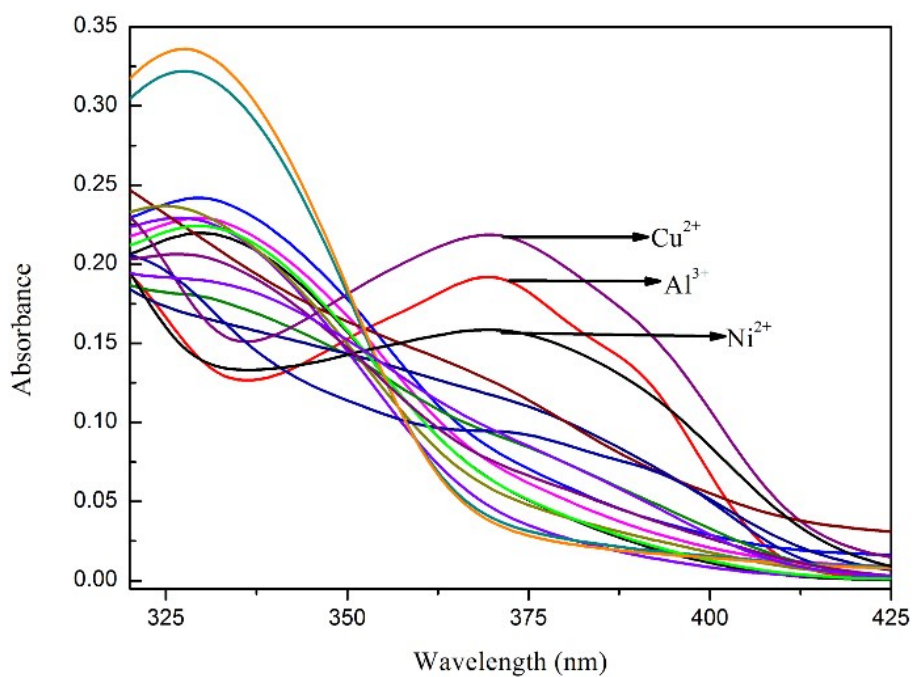

**Fig. S6** UV-vis absorption spectra of PEGFB (10  $\mu\text{M}$ ) upon addition of 2.0 equiv. of different metal ions ( $\text{Al}^{3+}$ ,  $\text{Ba}^{2+}$ ,  $\text{Ce}^{3+}$ ,  $\text{Cd}^{2+}$ ,  $\text{Co}^{2+}$ ,  $\text{Cr}^{3+}$ ,  $\text{Cu}^{2+}$ ,  $\text{Fe}^{3+}$ ,  $\text{Hg}^{2+}$ ,  $\text{In}^{3+}$ ,  $\text{K}^{+}$ ,  $\text{Mn}^{2+}$ ,  $\text{Na}^{+}$ ,  $\text{Ni}^{2+}$ ,  $\text{Pb}^{2+}$  and  $\text{Zn}^{2+}$ ) in 100% water.

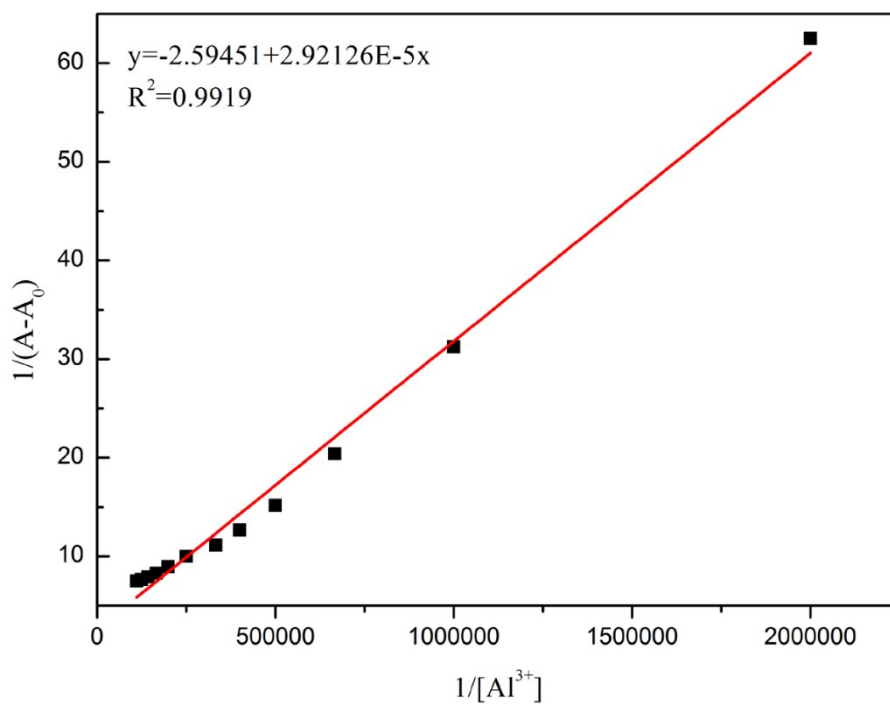

**Fig. S7** The Benesi-Hildebrand plot of PEGFB with  $Al^{3+}$  ions from UV-Vis titration profile for determination of binding constant.

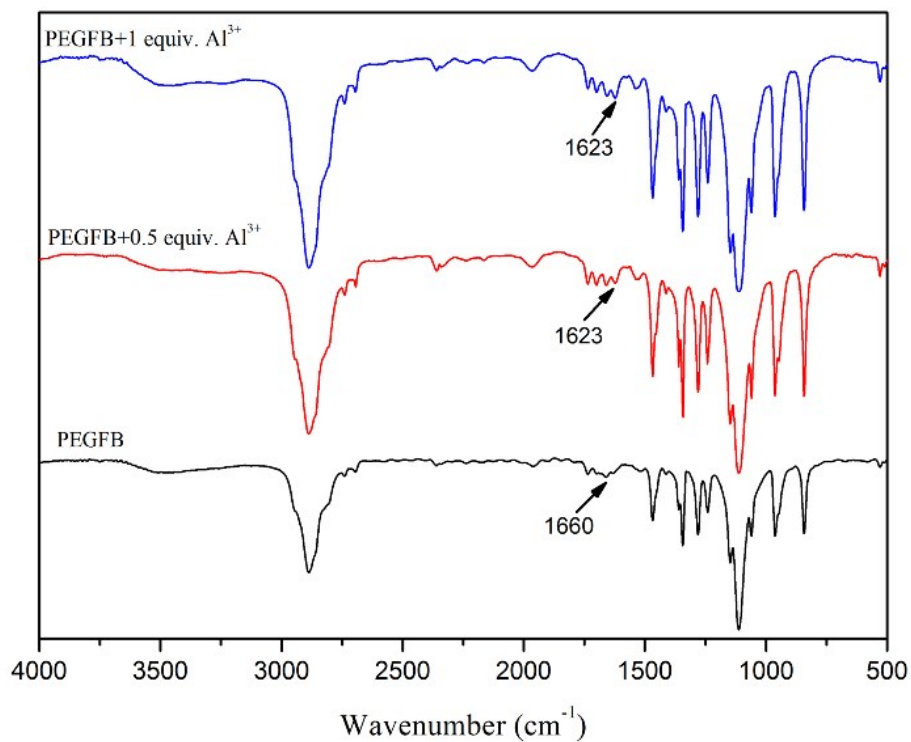

**Fig. S8** FT-IR titration spectra of PEGFB with  $Al^{3+}$ .

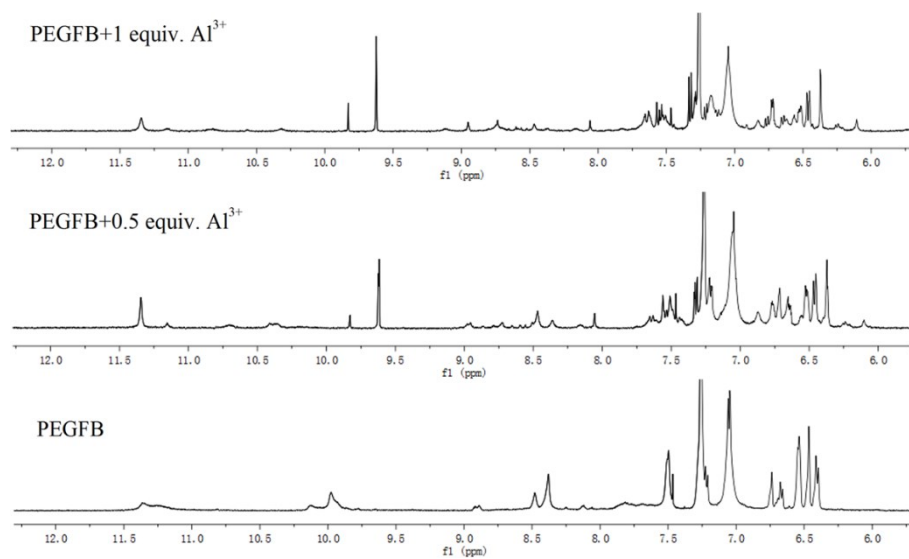

**Fig. S9**  $^1\text{H}$  NMR titration spectra of PEGFB with  $\text{Al}^{3+}$ .

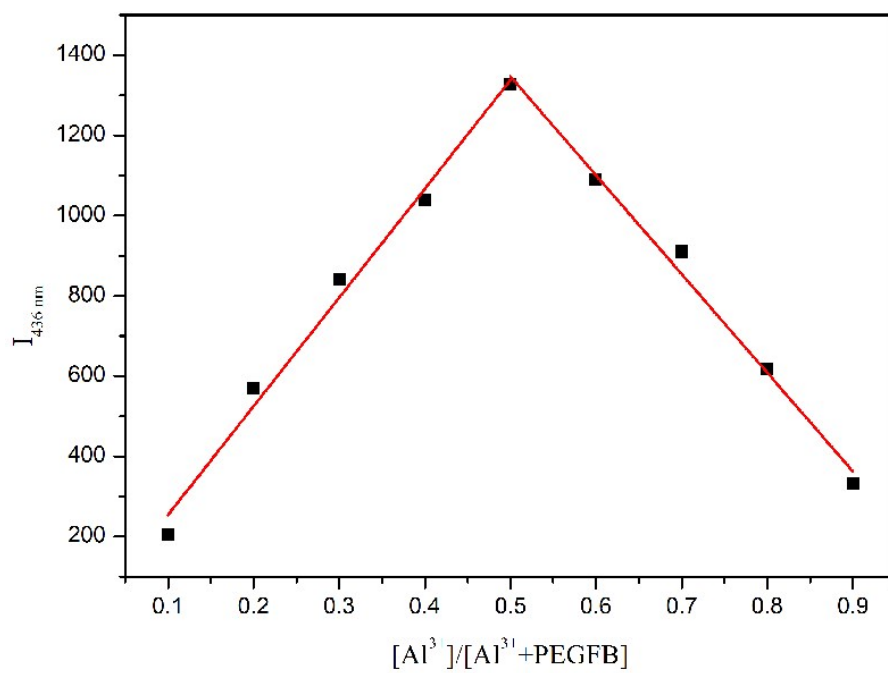

**Fig. S10** Job's plot for determining the stoichiometry of PEGFB with  $\text{Al}^{3+}$ .

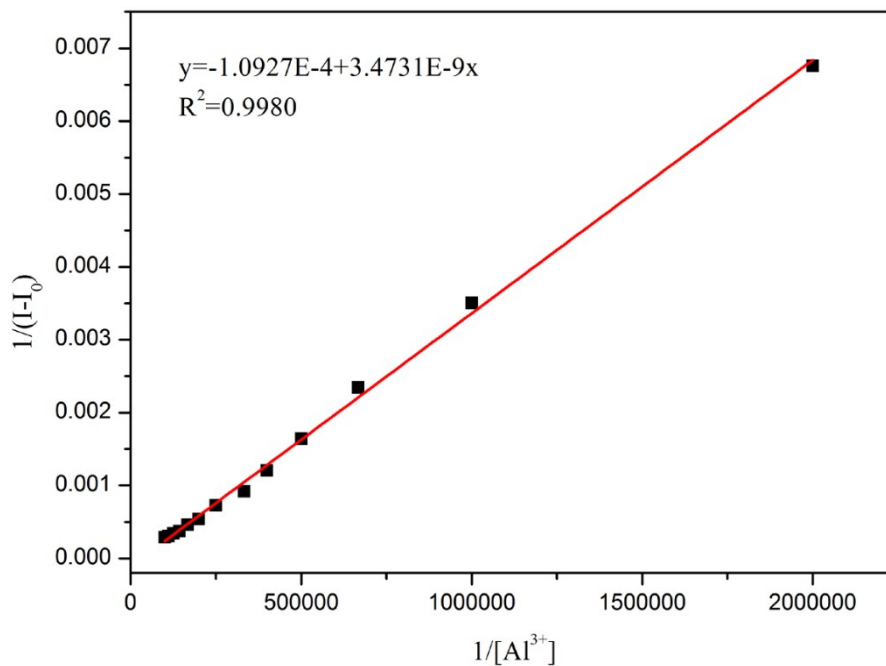

**Fig. S11** The Benesi-Hildebrand plot of PEGFB with  $Al^{3+}$  ions from fluorescence titration profile for determination of binding constant.

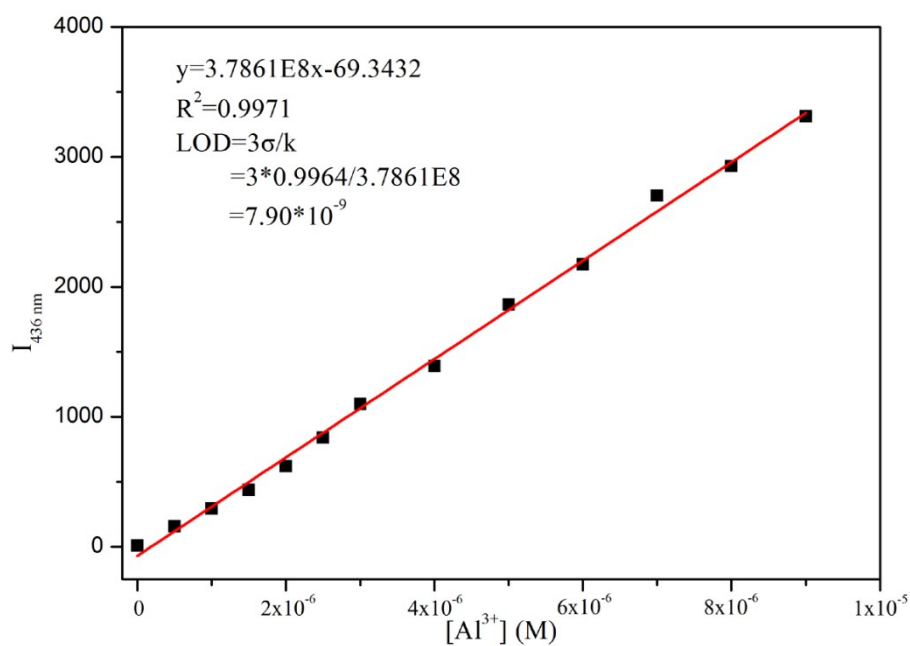

**Fig. S12** The linear of fluorescence intensity and concentration of  $Al^{3+}$  for the determination of the detection limit.

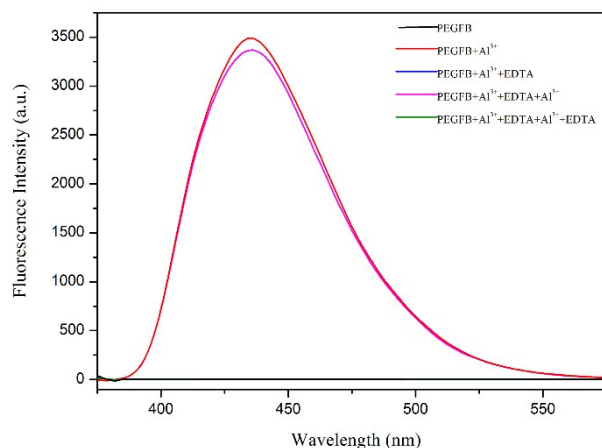

**Fig. S13** Fluorescence spectral change of the PEGFB solution upon the sequential addition of  $\text{Al}^{3+}$  (1 equiv.) and EDTA (1 equiv.).

**Table S1** Comparison of PEGFB with some reported fluorescent chemosensors for  $\text{Al}^{3+}$ .

| Structure | Detection limit (M)   | Binding constant ( $\text{M}^{-1}$ ) | Solvent                                     | Ref |
|-----------|-----------------------|--------------------------------------|---------------------------------------------|-----|
|           | $4.08 \times 10^{-8}$ | $2.139 \times 10^5$                  | DMF/ $\text{H}_2\text{O}$<br>(1/9, v/v)     | 1   |
|           | $8.08 \times 10^{-8}$ | $1.57 \times 10^5$                   | methanol                                    | 2   |
|           | $1.37 \times 10^{-7}$ | $3.01 \times 10^4$                   | methanol                                    | 3   |
|           | $3.19 \times 10^{-8}$ | $1.21 \times 10^4$                   | DMF/methanol<br>(1/1, v/v)                  | 4   |
|           | $3.48 \times 10^{-8}$ | $1.30 \times 10^4$                   | ethanol/ $\text{H}_2\text{O}$<br>(3/1, v/v) | 5   |
|           | $2.78 \times 10^{-6}$ | $1.9 \times 10^4$                    | ethanol                                     | 6   |
|           | $2 \times 10^{-7}$    | $3.68 \times 10^4$                   | ethanol                                     | 7   |
|           | $6 \times 10^{-7}$    | $1 \times 10^5$                      | DMSO/ $\text{H}_2\text{O}$<br>(9/1, v/v)    | 8   |



|                                                                                   |                       |                     |                                     |           |
|-----------------------------------------------------------------------------------|-----------------------|---------------------|-------------------------------------|-----------|
| 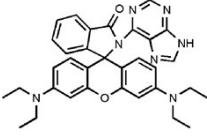 | $1.9 \times 10^{-7}$  | $4.786 \times 10^4$ | DMSO/H <sub>2</sub> O<br>(1/4, v/v) | 9         |
|  | $7.90 \times 10^{-9}$ | $2.99 \times 10^4$  | water                               | This work |

## References

- 1 S. Zeng, S. J. Li, X. J. Sun, M. Q. Li, Z. Y. Xing and J. L. Li, *Inorg. Chim. Acta*, 2019, **486**, 654-662.
- 2 Y. Wang, Z. Y. Ma, D. L. Zhang, J. L. Deng, X. Chen, C. Z. Xie and J. Y. Xu, *Spectrochim. Acta A*, 2018, **195**, 157-164.
- 3 H. Tian, X. Qiao, Z. L. Zhang, C. Z. Xie, Q. Z. Li and J. Y. Xu, *Spectrochim. Acta A*, 2019, **207**, 31-38.
- 4 C. J. Liu, Z. Y. Yang, L. Fan, X. L. Jin, J. M. An, X. Y. Cheng and B. D. Wang, *J. Lumin.*, 2015, **158**, 172-175.
- 5 B. J. Pang, C. R. Li and Z. Y. Yang, *J. Photoch. Photobio., A* 2018, **356**, 159-165.
- 6 B. Das, S. Dey, G.P. Maiti, A. Bhattacharjee, A. Dhara and A. Jana, *New J. Chem.*, 2018, **42**, 9424-9435.
- 7 Y. J. Liu, F. F. Tian, X. Y. Fan, F. L. Jiang and Y. Liu, *Sens. Actuators B*, 2017, **240**, 916-925.
- 8 Z. Kejík, R. Kaplánek, M. Havlík, T. Bříza, D. Vavřinová, B. Dolenský, P. Martásek and V. Král, *J. Lumin.*, 2016, **180**, 269-277.
- 9 S. Sahana, S. Bose, S. K. Mukhopadhyay and P. K. Bharadwaj, *J. Lumin.*, 2016, **169**, 334-341.
